# Supplementary material for: The Usefulness of the Ratio of Antigen–Autoantibody Immune Complexes to Their Free Antigens in the Diagnosis of Non-Small Cell Lung Cancer
Source: MDPI journal article supplement (doi:10.3390/diagnostics13182999), 2023-09-20
Supplement: s1 [file s1]

## Supplement

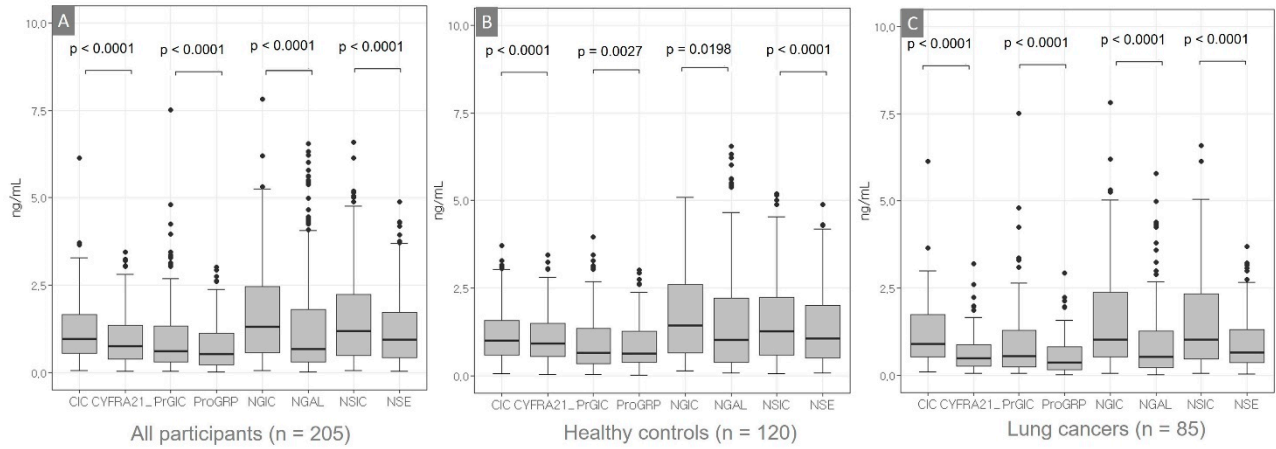

**Figure S1.** The levels of AICs and their antigens for CYFRA21-1, ProGRP, NGAL, and NSE in all participants (A), in healthy controls (B), and in patients with lung cancers (C). Abbreviations: CIC, CYFRA21-1-Anti-CYFRA21-1 autoantibody immune complex; PrGIC, ProGRP-Anti-ProGRP autoantibody immune complex; NGIC, NGAL-Anti-NGAL autoantibody immune complex; NSIC, NSE-Anti-NSE autoantibody immune complex.

**Table S1.** The levels of antigen-autoantibody immune complex, and free antigen, their ratios, and combinations from two to four ratios for four proteins.

| markers                                | NSCLC<br>(n = 86)  | Healthy Control<br>(n = 120) | p-Value<br>(NSCLC vs. Healthy<br>control) |
|----------------------------------------|--------------------|------------------------------|-------------------------------------------|
| CIC<br>(median (IQR), ng/mL)           | 0.91 (0.54, 1.75)  | 1.00 (0.58, 1.57)            | 0.7031                                    |
| CYFRA21-1<br>(median (IQR), ng/mL)     | 0.49 (0.26, 0.88)  | 0.92 (0.56, 1.5)             | <b>&lt;0.0001</b>                         |
| PrGIC<br>(median (IQR), ng/mL)         | 0.55 (0.24, 1.30)  | 0.66 (0.34, 1.36)            | 0.3007                                    |
| ProGRP, ng/mL<br>(median (IQR), ng/mL) | 0.37 (0.16, 0.81)  | 0.64 (0.39, 1.27)            | <b>0.0002</b>                             |
| NGIC<br>(median (IQR), ng/mL)          | 1.02 (0.53, 2.38)  | 1.43 (0.66, 2.61)            | 0.2680                                    |
| NGAL<br>(median (IQR), ng/mL)          | 0.54 (0.22, 1.27)  | 1.04 (0.38, 2.21)            | <b>0.0015</b>                             |
| NSIC<br>(median (IQR), ng/mL)          | 1.03 (0.47, 2.34)  | 1.28 (0.59, 2.23)            | 0.4056                                    |
| NSE<br>(median (IQR), ng/mL)           | 0.65 (0.37, 1.31)  | 1.07 (0.52, 2.02)            | <b>0.0105</b>                             |
| CIC/ CYFRA21-1 ratio<br>(median (IQR)) | 1.83 (1.40, 2.50)  | 1.08 (0.92, 1.3)             | <b>&lt;0.0001</b>                         |
| PrGIC/ ProGRP ratio<br>(median (IQR))  | 1.69 (1.17, 2.06)  | 1.06 (0.81, 1.32)            | <b>&lt;0.0001</b>                         |
| NGIC/NGAL ratio<br>(median (IQR))      | 2.05 (1.39, 2.45)  | 1.27 (1, 1.65)               | <b>&lt;0.0001</b>                         |
| NSIC/NSE ratio<br>(median (IQR))       | 1.49 (1.02, 1.82)  | 1.12 (0.99, 1.39)            | <b>0.0001</b>                             |
| C2-1<br>(median (IQR))                 | 3.13 (2.19, 4.25)  | 1.16 (0.81, 1.61)            | <b>&lt;0.0001</b>                         |
| C2-2<br>(median (IQR))                 | 3.25 (2.29, 5.83)  | 1.39 (1.06, 1.95)            | <b>&lt;0.0001</b>                         |
| C2-3<br>(median (IQR))                 | 2.69 (1.85, 4.04)  | 1.29 (0.95, 1.75)            | <b>&lt;0.0001</b>                         |
| C3-1<br>(median (IQR))                 | 5.96 (3.48, 9.59)  | 1.37 (1.01, 2.02)            | <b>&lt;0.0001</b>                         |
| C3-2<br>(median (IQR))                 | 4.63 (3.22, 8.41)  | 1.59 (1.2, 2.31)             | <b>&lt;0.0001</b>                         |
| C3-3<br>(median (IQR))                 | 3.96 (2.28, 7.35)  | 1.34 (0.86, 2.17)            | <b>&lt;0.0001</b>                         |
| C4-1<br>(median (IQR))                 | 8.10 (4.38, 14.07) | 1.61 (1.08, 2.64)            | <b>&lt;0.0001</b>                         |

Abbreviations: CIC, CYFRA21-1-Anti-CYFRA21-1 autoantibody immune complex; PrGIC, ProGRP-Anti-ProGRP autoantibody immune complex; NGIC, NGAL-Anti-NGAL autoantibody immune complex; NSIC, NSE-Anti-NSE autoantibody immune complex; NSCLC, non-small cell lung cancer; IQR, interquartile ranges

**Table S2.** The area under the curve (AUC)

| Variable      | AUC   | 95 % CI         | P-value            |
|---------------|-------|-----------------|--------------------|
| CIC           | 0.484 | 0.403 to 0.565  | <b>0.7022</b>      |
| CYFRA21-1     | 0.311 | 0.236 to 0.385  | <b>&lt; 0.0001</b> |
| PrGIC         | 0.458 | 0.376 to 0.539  | <b>0.3002</b>      |
| ProGRP        | 0.347 | 0.580 to 0.729  | <b>0.0002</b>      |
| NGIC          | 0.455 | 0.373 to 0.536  | 0.2675             |
| NGAL          | 0.630 | 0.565 to 0.7000 | 0.0015             |
| NSIC          | 0.534 | 0.444 to 0.616  | 0.4049             |
| NSE           | 0.605 | 0.520 to 0.688  | 0.0104             |
| CIC/CYFRA21-1 | 0.829 | 0.769 to 0.889  | <b>&lt; 0.0001</b> |
| PrGIC/ProGRP  | 0.768 | 0.703 to 0.833  | <b>&lt; 0.0001</b> |
| NGIC/NGAL     | 0.774 | 0.709 to 0.838  | <b>&lt; 0.0001</b> |
| NSIC/NSE      | 0.656 | 0.574 to 0.738  | <b>0.0001</b>      |
| C2-1          | 0.880 | 0.831 to 0.929  | <b>&lt; 0.0001</b> |
| C2-2          | 0.879 | 0.832 to 0.927  | <b>&lt; 0.0001</b> |
| C2-3          | 0.816 | 0.752 to 0.879  | <b>&lt; 0.0001</b> |
| C3-1          | 0.917 | 0.878 to 0.956  | <b>&lt; 0.0001</b> |
| C3-2          | 0.882 | 0.832 to 0.931  | <b>&lt; 0.0001</b> |
| C3-3          | 0.855 | 0.804 to 0.910  | <b>&lt; 0.0001</b> |
| C4-1          | 0.907 | 0.863 to 0.951  | <b>&lt; 0.0001</b> |

Abbreviations: CIC, CYFRA21-1-Anti-CYFRA21-1 autoantibody immune complex; PrGIC, ProGRP-Anti-ProGRP autoantibody immune complex; NGIC, NGAL-Anti-NGAL autoantibody immune complex; NSIC, NSE-Anti-NSE autoantibody immune complex; CI, confidence interval

**Table S3.** The diagnostic efficiency of the C4-1 including false positive and false negative rates at the specificity of 86.7% according to stage in patients with NSCLC.

| Stage (number)                       | Sensitivity<br>(95% CI) | PPV<br>(95% CI)     | NPV<br>(95% CI)     | False Positive<br>(95% CI) | False Negative<br>(95% CI) |
|--------------------------------------|-------------------------|---------------------|---------------------|----------------------------|----------------------------|
| CIS (n=2)                            | 100<br>(19.8–100)       | 11.1<br>(1.9–36.1)  | 100<br>(95.6–100)   | 88.9<br>(63.9–98.1)        | 0<br>(0–4.43)              |
| Stage I (n=39)                       | 89.7<br>(74.8–96.7)     | 68.6<br>(54.0–80.5) | 96.3<br>(90.2–98.8) | 31.4<br>(19.5–46.0)        | 3.7<br>(1.2–9.8)           |
| Stage II (n=16)                      | 62.5<br>(35.9–83.7)     | 38.5<br>(20.9–59.3) | 94.5<br>(88.0–97.8) | 61.5<br>(40.7–79.1)        | 5.5<br>(2.2–12.0)          |
| Stage III (n=24)                     | 91.7<br>(71.5–98.5)     | 57.9<br>(40.9–73.2) | 98.1<br>(92.7–99.7) | 42.1<br>(26.7–59.1)        | 1.9<br>(0.3–7.3)           |
| Stage IV (n=4)                       | 100<br>(39.6–100)       | 20.0<br>(6.6–44.3)  | 100<br>(55.7–93.4)  | 80.0<br>(55.7–93.4)        | 0<br>(0–4.4)               |
| Very early-stage<br>CIS (0)–I (n=41) | 90.2<br>(75.9–96.8)     | 69.8<br>(55.5–81.3) | 96.3<br>(90.2–98.8) | 20.2<br>(18.7–44.5)        | 3.7<br>(1.2–9.8)           |
| Stage II–IV (n=44)                   | 81.8<br>(64.2–89.7)     | 69.2<br>(54.7–80.9) | 92.9<br>(86.0–96.6) | 30.8<br>(19.1–45.3)        | 7.1<br>(3.4–14.0)          |

Abbreviations: CIS, Carcinoma in situ; PPV, positive predictive value; NPV, negative predictive value; NSCLC, non-small cell lung cancer; CI, confidence interval.

**Table S4.** The diagnostic efficiency of C4-1 including false positive and false negative rates at the specificity of 86.7% according to pathological diagnosis in patients with NSCLC.

| Type<br>(number)                                  | Sensitivity<br>(95% CI) | PPV<br>(95% CI)     | NPV<br>(95% CI)      | False Positive<br>(95% CI) | False Negative<br>(95% CI) |
|---------------------------------------------------|-------------------------|---------------------|----------------------|----------------------------|----------------------------|
| NSCLC (n=85)                                      | 85.9<br>(76.6–92.5)     | 82.0<br>(72.5–89.4) | 89.7<br>(82.6–94.5)  | 18.0<br>(10.6–27.5)        | 10.3<br>(5.5–7.4)          |
| Adenocarcinoma<br>(n=38, 25/4/9/1*)               | 89.7<br>(74.8–96.6)     | 68.6<br>(54.0–80.5) | 96.3<br>(90.2–98.8)  | 31.4<br>(19.7–46.0)        | 3.7<br>(1.2–9.8)           |
| Squamous cell<br>carcinoma<br>(n=38, 14/10/12/2*) | 81.6<br>(65.1–91.7)     | 66.0<br>(50.6–78.7) | 93.7<br>(87.0–97.2)  | 34.0<br>(12.3–49.4)        | 6.3<br>(2.8–13.0)          |
| Other NSCLCs<br>(n=9, 3/2/3/1*)                   | 87.5<br>(46.7–99.3)     | 30.4<br>(14.1–53.0) | 99.0<br>(94.0–100.0) | 69.6<br>(47.0–85.9)        | 1.0<br>(0.0–6.0)           |

\* Total number of each pathologic type and the number divided into patients with stages 0-I/II/III/IV.

Abbreviations: CIS, Carcinoma in situ; PPV, positive predictive value; NPV, negative predictive value; NSCLC, non-small cell lung cancer; CI, confidence interval.

**Table S5.** The diagnostic efficiency of each ratio for the four proteins according to pathological diagnosis in patients with NSCLC.

| Variable                        | Pathological type          | Sensitivity<br>(95% CI) | Specificity<br>(95% CI) | PPV<br>(95% CI)     | NPV<br>(95% CI)     |
|---------------------------------|----------------------------|-------------------------|-------------------------|---------------------|---------------------|
| CIC/CYFRA21-1<br>(cut-off 1.33) | NSCLC                      | 81.2<br>(71.8–88.8)     | 77.5<br>(69.0–84.6)     | 71.9<br>(61.8–80.6) | 85.3<br>(77.3–91.4) |
|                                 | Adenocarcinoma             | 78.9<br>(62.2–89.9)     |                         | 52.6<br>(39.1–65.8) | 92.1<br>(84.5–96.3) |
|                                 | Squamous cell<br>carcinoma | 84.2<br>(68.1–93.4)     |                         | 54.2<br>(40.8–67.1) | 93.9<br>(86.8–97.5) |
|                                 | Others                     | 77.8<br>(40.2–96.1)     |                         | 20.6<br>(9.3–38.4)  | 97.9<br>(91.9–99.6) |
|                                 |                            |                         |                         |                     |                     |
| PrGIC/ProGRP<br>(cut-off 1.41)  | NSCLC                      | 67.1<br>(56.0–76.9)     | 79.2<br>(70.8–86.0)     | 69.5<br>(58.4–68.8) | 77.2<br>(68.8–84.3) |
|                                 | Adenocarcinoma             | 68.4<br>(51.2–82.0)     |                         | 51.0<br>(36.8–65.0) | 88.8<br>(80.9–93.8) |
|                                 | Squamous cell<br>carcinoma | 68.4<br>(51.2–82.0)     |                         | 51.0<br>(36.8–65.0) | 88.8<br>(80.9–93.8) |
|                                 | Others                     | 55.6<br>(22.7–84.7)     |                         | 16.7<br>(6.30–35.5) | 96.0<br>(89.4–98.7) |
|                                 |                            |                         |                         |                     |                     |
| NGIC/NGAL<br>(cut-off 1.55)     | NSCLC                      | 69.4<br>(58.5–79.0)     | 70.8<br>(61.8–78.8)     | 62.8<br>(52.2–72.5) | 76.6<br>(67.6–84.1) |
|                                 | Adenocarcinoma             | 78.9<br>(62.2–89.9)     |                         | 46.2<br>(33.9–58.9) | 91.4<br>(83.3–95.9) |
|                                 | Squamous cell<br>carcinoma | 57.9<br>(40.9–73.3)     |                         | 38.6<br>(26.3–52.4) | 84.2<br>(75.2–90.4) |
|                                 | Others                     | 77.8<br>(40.2–96.1)     |                         | 16.7<br>(7.5–32.0)  | 97.7<br>(91.2–99.6) |
|                                 |                            |                         |                         |                     |                     |
| NSIC/NSE<br>(cut-off 1.22)      | NSCLC                      | 63.5<br>(52.4–73.7)     | 60.8<br>(51.5–69.6)     | 53.5<br>(43.3–63.5) | 70.2<br>(60.4–78.8) |

|                         |                     |                     |                     |
|-------------------------|---------------------|---------------------|---------------------|
| Adenocarcinoma          | 63.2<br>(46.0–77.7) | 33.8<br>(23.3–46.1) | 83.9<br>(74.1–90.6) |
| Squamous cell carcinoma | 60.5<br>(43.5–75.5) | 32.9<br>(22.4–45.2) | 83.0<br>(73.1–89.8) |
| Others                  | 77.8<br>(40.2–96.1) | 13.0<br>(5.8–25.5)  | 97.3<br>(89.8–99.5) |

---

Abbreviations: PPV, positive predictive value; NPV, negative predictive value; NSCLC, non-small cell lung cancer; CI, confidence interval.
